# Supplementary material
Source: PubMed Central journal article supplement (PMC6804624)
Supplement: DB190120SupplementaryData.pdf [file DB190120SupplementaryData.pdf]

SUPPLEMENTARY DATA

**Supplementary Table S1.** Multivariable regression model for follow-up oDI<sub>c-pep</sub>. Data are expressed as  $\beta$ -coefficient  $\pm$  standard error.

| <b>Multivariate regression analysis for follow-up DI<sub>c-pep</sub></b>                                                                                                                                                                                                    |                      |              |
|-----------------------------------------------------------------------------------------------------------------------------------------------------------------------------------------------------------------------------------------------------------------------------|----------------------|--------------|
|                                                                                                                                                                                                                                                                             | $\beta \pm SE$       | <i>p</i>     |
| Hepatic Clearance (ml/m <sup>2</sup> /min)                                                                                                                                                                                                                                  | -8.04 $\pm$ 3.24     | <b>0.018</b> |
| Peripheral Clearance (ml/m <sup>2</sup> /min)                                                                                                                                                                                                                               | -679.35 $\pm$ 402.64 | 0.100        |
| BMI (kg/m <sup>2</sup> )                                                                                                                                                                                                                                                    | -6.10 $\pm$ 5.58     | 0.281        |
| Age (y)                                                                                                                                                                                                                                                                     | 26.83 $\pm$ 21.75    | 0.225        |
| Sex (F)                                                                                                                                                                                                                                                                     | 54.34 $\pm$ 74.14    | 0.468        |
| Ethnicity*                                                                                                                                                                                                                                                                  |                      |              |
| NHB                                                                                                                                                                                                                                                                         | 181.59 $\pm$ 87.54   | <b>0.045</b> |
| Hispanic                                                                                                                                                                                                                                                                    | 38.59 $\pm$ 85.42    | 0.654        |
| 2h-glucose (mg/dL)                                                                                                                                                                                                                                                          | -1.40 $\pm$ 1.50     | 0.359        |
| Tanner stage**                                                                                                                                                                                                                                                              |                      |              |
| IV-V                                                                                                                                                                                                                                                                        | -60.65 $\pm$ 129.73  | 0.643        |
| Baseline DI <sub>c-pep</sub>                                                                                                                                                                                                                                                | 0.015 $\pm$ 0.023    | 0.523        |
| The reference groups are *NHW; **Tanner Stage II-III and ***nOb-NGT.<br>DI <sub>c-pep</sub> , disposition index c-peptide derived; BMI, body mass index; NHW, non-Hispanic White; NHB, non Hispanic Black. Data are expressed as beta coefficient $\pm$ standard error (SE) |                      |              |
